# Supplementary material for: Yet Another Similarity between Mitochondrial and Bacterial Ribosomal Small Subunit Biogenesis Obtained by Structural Characterization of RbfA from S. aureus
Source: MDPI journal article supplement (doi:10.3390/ijms24032118), 2023-01-20
Supplement: s1 [file s1]

*Supplementary Materials*

**Yet another similarity between mitochondrial and bacterial ribosomal small subunit biogenesis obtained by structural characterization of RbfA from *S. aureus***

Aydar G. Bikmullin, Bulat Fatkhullin, Artem Stetsenko, Azat Gabdulkhakov, Natalia Garaeva, Liliia Nurullina, Evelina Klochkova, Alexander Golubev, Iskander Khusainov, Natalie Trachtmann, Dmitriy Blokhin, Albert Guskov, Shamil Validov, Konstantin Usachev and Marat Yusupov

This file includes:

- I. Supplementary Figures S1, S2, S3, S4, S5, S6, S7, S8, S9 with legend;
- II. Supplementary Tables S1, S2, S3, S4.

# I. SUPPLEMENTARY FIGURES

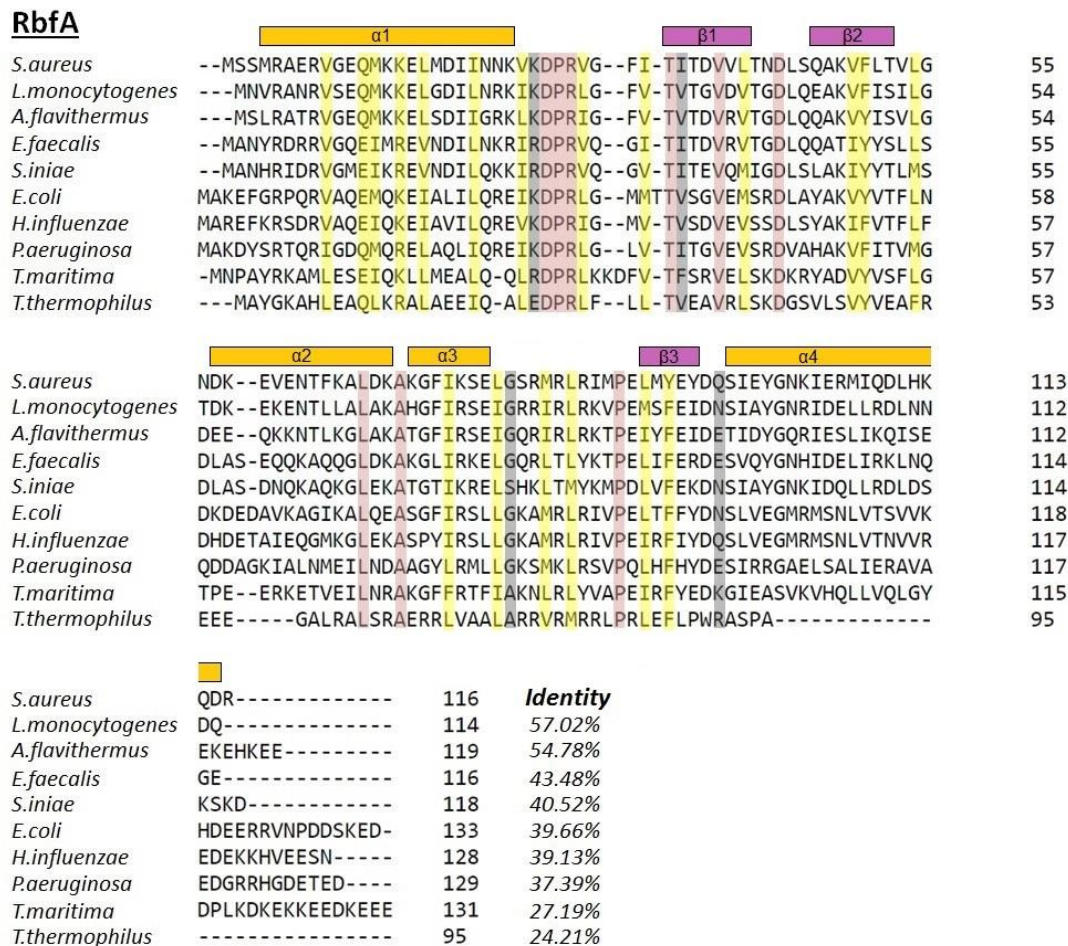

**Supplementary Figure S1.** Multiple sequence alignment and identity percentages of RbfA from 10 different bacterial species performed in Clustal Omega [58]. Pink shading indicates positions that have a single, fully conserved residue (identity), yellow – conservation between amino acids with substantial sequence identity, and gray – amino acids with low sequence identity. The secondary structure elements of *S. aureus* RbfA are framed in orange and violet.

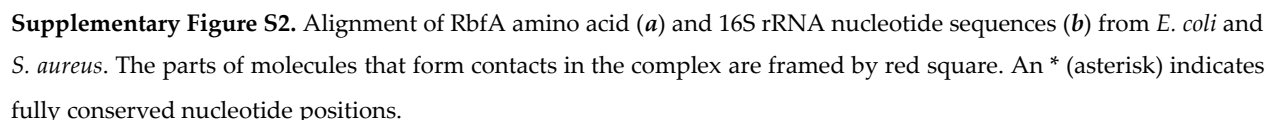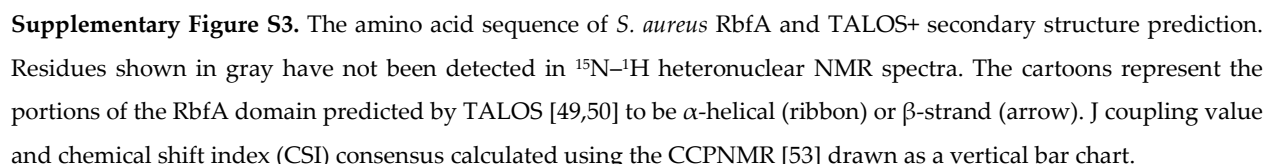



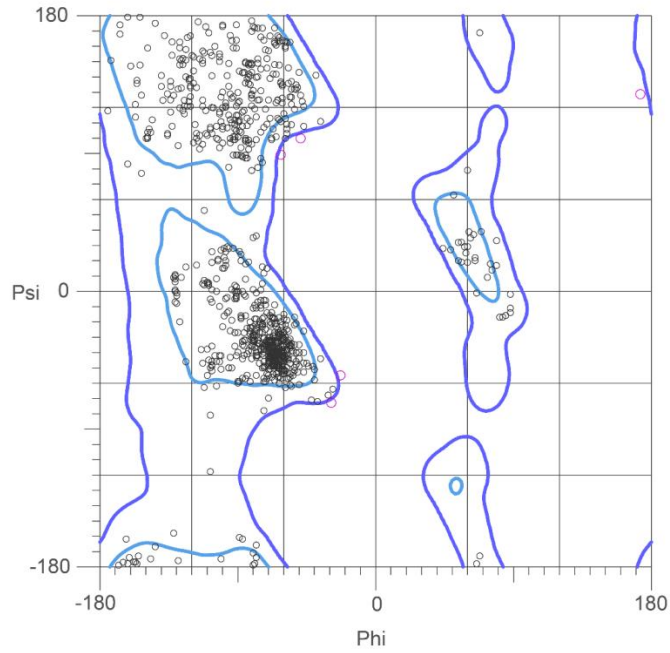

**Supplementary Figure S4.** The Ramachandran plot of *S. aureus* RbfA conformers.

|                                                                                                                                                                                                                                                                                                                                                          |                                                                                                                                                                                                                                                                                                                                                           |
|----------------------------------------------------------------------------------------------------------------------------------------------------------------------------------------------------------------------------------------------------------------------------------------------------------------------------------------------------------|-----------------------------------------------------------------------------------------------------------------------------------------------------------------------------------------------------------------------------------------------------------------------------------------------------------------------------------------------------------|
| <p>#1</p> <p>Seq: GSSMRAERVG EQMKKELMDI INNKKVDPRV GFITITDVVL TNDLSQAKVF 50</p> <p>SS: cccHHHHHH HHHHHHHHH HHHHScTTS ccEEEEEE cTTSccEEEE 100</p> <p>Seq: LTVLGNDKEV ENTFKALDKA KGFIKSELGS RMRLRIMPEL MYEYDQSIIEY 100</p> <p>SS: EEESScHHHH HHHHHHHHH HHHHHHHHHT TcScSSccEE EEEccSSSc</p> <p>Seq: GNKIERMIQD LHKQDRVE 118</p> <p>SS: cccScccc cGGGccc</p> | <p>#6</p> <p>Seq: GSSMRAERVG EQMKKELMDI INNKKVDPRV GFITITDVVL TNDLSQAKVF 50</p> <p>SS: cccHHHHHH HHHHHHHHH HHHHScTTS ccEEEEEE cTTSccEEEE 100</p> <p>Seq: LTVLGNDKEV ENTFKALDKA KGFIKSELGS RMRLRIMPEL MYEYDQSIIEY 100</p> <p>SS: EEESScHHHH HHHHHHHHH HHHHHHHHHT SSccSSccEE EEEccSSSc</p> <p>Seq: GNKIERMIQD LHKQDRVE 118</p> <p>SS: cccccScSc cTTGGGc</p> |
| <p>#2</p> <p>Seq: GSSMRAERVG EQMKKELMDI INNKKVDPRV GFITITDVVL TNDLSQAKVF 50</p> <p>SS: cccHHHHHH HHHHHHHHH HHHHScTTS ccEEEEEE cTTSccEEEE 100</p> <p>Seq: LTVLGNDKEV ENTFKALDKA KGFIKSELGS RMRLRIMPEL MYEYDQSIIEY 100</p> <p>SS: EEcSScHHHH HHHHHHHHH HHHHHHHHHT TcScSccEE EEEccSSSc</p> <p>Seq: GNKIERMIQD LHKQDRVE 118</p> <p>SS: cccScccc cGGGccc</p>  | <p>#7</p> <p>Seq: GSSMRAERVG EQMKKELMDI INNKKVDPRV GFITITDVVL TNDLSQAKVF 50</p> <p>SS: cccHHHHHH HHHHHHHHH HHHHScTTS ccEEEEEE cTTSccEEEE 100</p> <p>Seq: LTVLGNDKEV ENTFKALDKA KGFIKSELGS RMRLRIMPEL MYEYDQSIIEY 100</p> <p>SS: EEESScHHHH HHHHHHHHH HHHHHHHHHT cccSSccEE EEEccSSSc</p> <p>Seq: GNKIERMIQD LHKQDRVE 118</p> <p>SS: cccSccSc cTTcSc</p>    |
| <p>#3</p> <p>Seq: GSSMRAERVG EQMKKELMDI INNKKVDPRV GFITITDVVL TNDLSQAKVF 50</p> <p>SS: cccHHHHHH HHHHHHHHH HHHHScTTS ccEEEEEE cTTSccEEEE 100</p> <p>Seq: LTVLGNDKEV ENTFKALDKA KGFIKSELGS RMRLRIMPEL MYEYDQSIIEY 100</p> <p>SS: EEESScHHHH HHHHHHHHH HHHHHHHHHT ScScSccEE EEEccSSSc</p> <p>Seq: GNKIERMIQD LHKQDRVE 118</p> <p>SS: ccTccBecc BGGGccc</p> | <p>#8</p> <p>Seq: GSSMRAERVG EQMKKELMDI INNKKVDPRV GFITITDVVL TNDLSQAKVF 50</p> <p>SS: cccHHHHHH HHHHHHHHH HHHHScTTS ScEEEEEE cSScEEEE 100</p> <p>Seq: LTVLGNDKEV ENTFKALDKA KGFIKSELGS RMRLRIMPEL MYEYDQSIIEY 100</p> <p>SS: EEcScHHHH HHHHHHHHH HHHHHHHHHT SSccSSccEE EEEccTTT 118</p> <p>Seq: GNKIERMIQD LHKQDRVE 118</p> <p>SS: cccSScccc cSGGccc</p> |
| <p>#4</p> <p>Seq: GSSMRAERVG EQMKKELMDI INNKKVDPRV GFITITDVVL TNDLSQAKVF 50</p> <p>SS: cccHHHHHH HHHHHHHHH HHHHScTTS ccEEEEEE cTTSccEEEE 100</p> <p>Seq: LTVLGNDKEV ENTFKALDKA KGFIKSELGS RMRLRIMPEL MYEYDQSIIEY 100</p> <p>SS: EEESScHHHH HHHHHHHHH HHHHHHHHHT TTcSScEE EEEccSSSc</p> <p>Seq: GNKIERMIQD LHKQDRVE 118</p> <p>SS: cccSccSc cTTTTcc</p>   | <p>#9</p> <p>Seq: GSSMRAERVG EQMKKELMDI INNKKVDPRV GFITITDVVL TNDLSQAKVF 50</p> <p>SS: cccHHHHHH HHHHHHHHH HHHHScTTS ScEEEEEE cTTSccEEEE 100</p> <p>Seq: LTVLGNDKEV ENTFKALDKA KGFIKSELGS RMRLRIMPEL MYEYDQSIIEY 100</p> <p>SS: EEESScHHHH HHHHHHHHH HHHHHHHHHT SSccSSccEE EEEccSSSc</p> <p>Seq: GNKIERMIQD LHKQDRVE 118</p> <p>SS: ccSccScSc cTTTTc</p>  |
| <p>#5</p> <p>Seq: GSSMRAERVG EQMKKELMDI INNKKVDPRV GFITITDVVL TNDLSQAKVF 50</p> <p>SS: cccHHHHHH HHHHHHHHH HHHHScTTS ScEEEEEE cTTSccEEEE 100</p> <p>Seq: LTVLGNDKEV ENTFKALDKA KGFIKSELGS RMRLRIMPEL MYEYDQSIIEY 100</p> <p>SS: EEESScHHHH HHHHHHHHH HHHHHHHHHT cccSSccEE EEEccSSSc</p> <p>Seq: GNKIERMIQD LHKQDRVE 118</p> <p>SS: cccccccc cTTTSc</p>   | <p>#10</p> <p>Seq: GSSMRAERVG EQMKKELMDI INNKKVDPRV GFITITDVVL TNDLSQAKVF 50</p> <p>SS: cccHHHHHH HHHHHHHHH HHHHScTTS ScEEEEEE cTTSccEEEE 100</p> <p>Seq: LTVLGNDKEV ENTFKALDKA KGFIKSELGS RMRLRIMPEL MYEYDQSIIEY 100</p> <p>SS: EEcScHHHH HHHHHHHHH HHHHHHHHHT SSccSSccEE EEEccSSSc</p> <p>Seq: GNKIERMIQD LHKQDRVE 118</p> <p>SS: ccSScccc cSSSc</p>    |

**Supplementary Figure S5.** The *S. aureus* RbfA secondary structure assignment by the DSSP program [34] for region 95D-118E (yellow) in several NMR structures. H –  $\alpha$ -helix; B –  $\beta$ -bridge; E –  $\beta$ -strand; G – 310 helix; I –  $\pi$ -helix; T – turn; S – bend; C – coil.

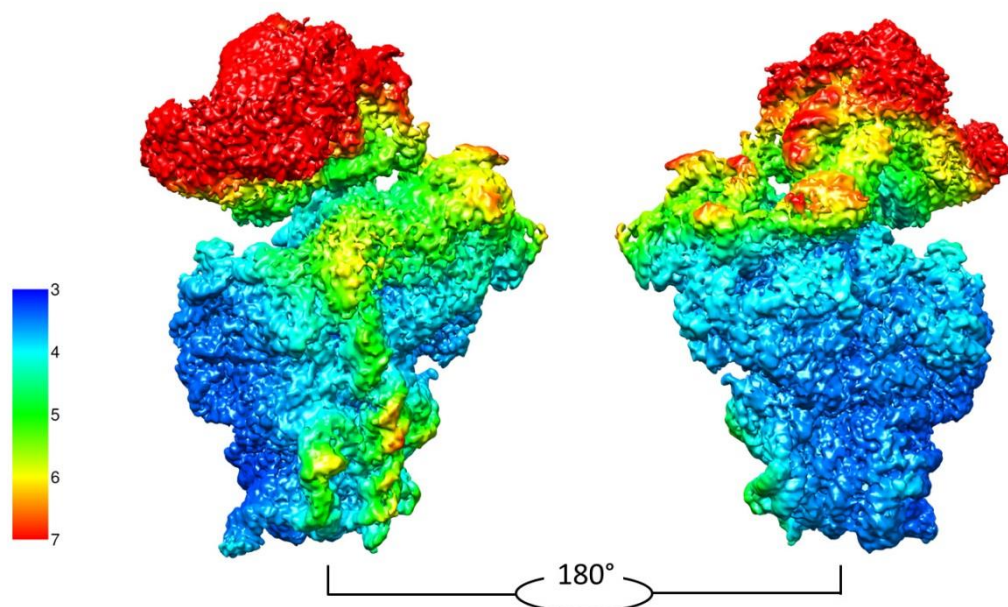

**Supplementary Figure S6.** Local resolution map of *S. aureus* 30S-RbfA complex.

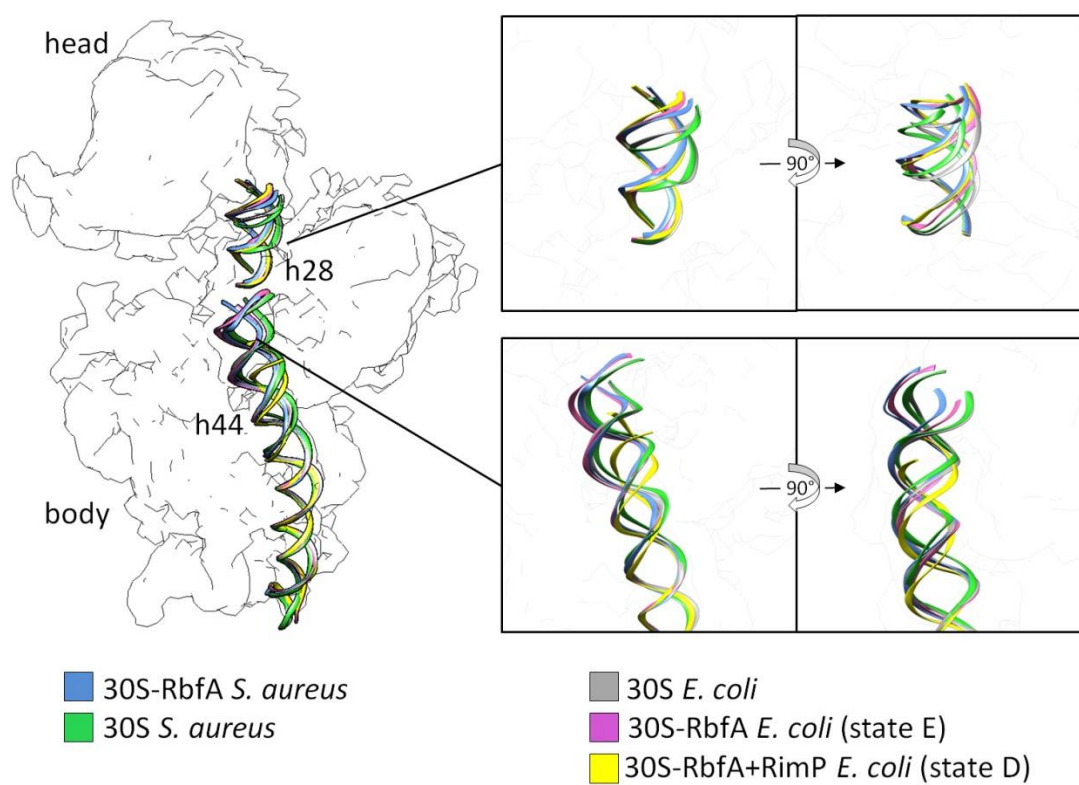

**Supplementary Figure S7.** Comparison of 16S rRNA h28 and h44 helices of *S. aureus* and *E. coli* in different states (mature or bound with RbfA). Mature *S. aureus* 30S subunit (PDB ID: 5ND8), mature *E. coli* 30S subunit (PDB ID: 7BOD), *E. coli* 30S subunit assembly complex state E (PDB ID: 7BOH), *E. coli* 30S subunit assembly complex state D 79 (PDB ID: 7NAV).

CLUSTAL O(1.2.4) multiple sequence alignment

|                |                                                             |    |
|----------------|-------------------------------------------------------------|----|
| S.aureus       | -----                                                       | 0  |
| E.coli         | -----                                                       | 0  |
| M.musculus mt  | MAAPALRAPLRNSGLALGVRCAVNLPLGTQVRGSRVAFEPREPLIDKEYVRKPAELTE  | 60 |
| H.sapiens mt   | MAAPAVKVARGWNSGLALGVRRAVLQPLGTQVRNSRYSPEFKDPLIDKEYVRKPAELTE | 60 |
| T.thermophilus | -----                                                       | 0  |
| H.influenzae   | -----                                                       | 0  |
| M.pneumoniae   | -----                                                       | 0  |
| T.maritima     | -----                                                       | 0  |

  

|                |                                                           |     |
|----------------|-----------------------------------------------------------|-----|
| S.aureus       | -----HPRKG-SVPKRDVLPDPIHNSKLVTKLINKIMLDGKRGTARILYSAFDLVEQ | 52  |
| E.coli         | -----HPRRR-VIGQRKILPDPIFGSELLAKFVNILHVDGKSTAESIVYSALETLAQ | 52  |
| M.musculus mt  | EEKYDQELKKQFIKAAATSTSVFADPVISKFTNMMHGGKVLARSLSMAQTLEAVR   | 120 |
| H.sapiens mt   | EEKYVRELKKQFIKAAAGKTSVFEDPVISKFTNMMHGGKVLARSLSMAQTLEAVR   | 120 |
| T.thermophilus | -----HARRR-RAEVRLQPDLYGDLVLTAFINKIMRDGKKLAARIFYDACKITQE   | 52  |
| H.influenzae   | -----HPRRR-SVEARKILPDPIFGSELLAKFVNILHVDGKSTAESIVYSALETLAQ | 52  |
| M.pneumoniae   | -----HRRN-RAPKRTVLDPVFNITLVTRIINVIHMDGKKGLAQRLVGFADLIEQ   | 51  |
| T.maritima     | -----HRRR-RAEKRIIPDPVFGDLVAKLINRVHMDGKKTAQRIYVGFADLIRE    | 51  |

  

|                |                                                           |     |
|----------------|-----------------------------------------------------------|-----|
| S.aureus       | -----RSGRDALVFEEAINIMPVLEKARRVGGSNVQVPEVRPERRT            | 97  |
| E.coli         | -----RSKGSELEAFEALENVRPTVEKSRVGGSTYQVPEVRPVRNR            | 97  |
| M.musculus mt  | KQFEKYRAASAEQATIERNPYRIFHEALKNCEPVLGLVPLTKGGHFYQVPLADRRRR | 180 |
| H.sapiens mt   | KQFEKYRAASAEQATIERNPYRIFHEALKNCEPVLGLVPLTKGGHFYQVPLADRRRR | 180 |
| T.thermophilus | -----KTGQELKVFQAVENKPRMEVRSRRVGGANVQVPEVSPRRQQ            | 97  |
| H.influenzae   | -----RTGKELEAFEALENVRPTVEKSRVGGSTYQVPEVRPVRNR             | 97  |
| M.pneumoniae   | -----RTKEKPLTVFERAVGNMPRLERVRRIAGSNVQVPEVPQDRKI           | 96  |
| T.maritima     | -----KTKKDPLEVFRQAVENKPVLEVRPRVGGATYQVPEVQEPRT            | 96  |

  

|                |                                                             |     |
|----------------|-------------------------------------------------------------|-----|
| S.aureus       | TLGLRWLVHYARLRGE--KTMEDRLANEILDAANITGGAVKKREDTHMAEANKAFAHYR | 155 |
| E.coli         | ALAMRWIVEAARKRGD--KSMALRLANESDAENKGTAVKKREDVHMAEANKAFAHYR   | 155 |
| M.musculus mt  | FLAMKWMITECRENKPRTLMPKLSHELLFAFHNRPVIRKHNHMAEANKRALAHYR     | 240 |
| H.sapiens mt   | FLAMKWMITECRENKPRTLMPKLSHELLFAFHNRPVIRKHNHMAEANKRALAHYR     | 240 |
| T.thermophilus | SLALRWLVQAANRPE--RRAAVRIAEHLMDAEGKGGAVKKEDVERMAEANKRAYAHYR  | 155 |
| H.influenzae   | ALGMRWIVEAARKRGD--KSMALRLANESDAENKGTAVKKREDVHMAEANKAFAHYR   | 155 |
| M.pneumoniae   | ALALRWIAFARKRHE--KTMLEKIANEIIASNNITGAIIKKDDTHMAEANKAFAHYR   | 154 |
| T.maritima     | SLALRWIVEAARAKKG--RPMKEKLAEEIIAAYNNTGTAIIKKEDTHMAEANKAFAHYR | 154 |

  

|                |                             |     |
|----------------|-----------------------------|-----|
| S.aureus       | -----                       | 156 |
| E.coli         | -----LSLRSFHQAGASSKQPALGYLN | 179 |
| M.musculus mt  | -----                       | 242 |
| H.sapiens mt   | -----                       | 242 |
| T.thermophilus | -----                       | 156 |
| H.influenzae   | -----                       | 156 |
| M.pneumoniae   | -----                       | 155 |
| T.maritima     | -----                       | 155 |

**Supplementary Figure S8.** Comparison of homologs of S7 ribosomal protein from different organisms was performed in Clustal Omega [58]. Pink shading indicates positions that have a single, fully conserved residue (identity), yellow – conservation between amino acids with substantial sequence identity. The helix of S7 interacting with the C-terminal helix of RbfA is framed in red. An \* (asterisk) indicates positions which have a single, fully conserved residue. A : (colon) indicates conservation between groups of strongly similar properties - scoring > 0.5 in the Gonnet PAM 250 matrix. A . (period) indicates conservation between groups of weakly similar properties - scoring <= 0.5 in the Gonnet PAM 250 matrix [58].

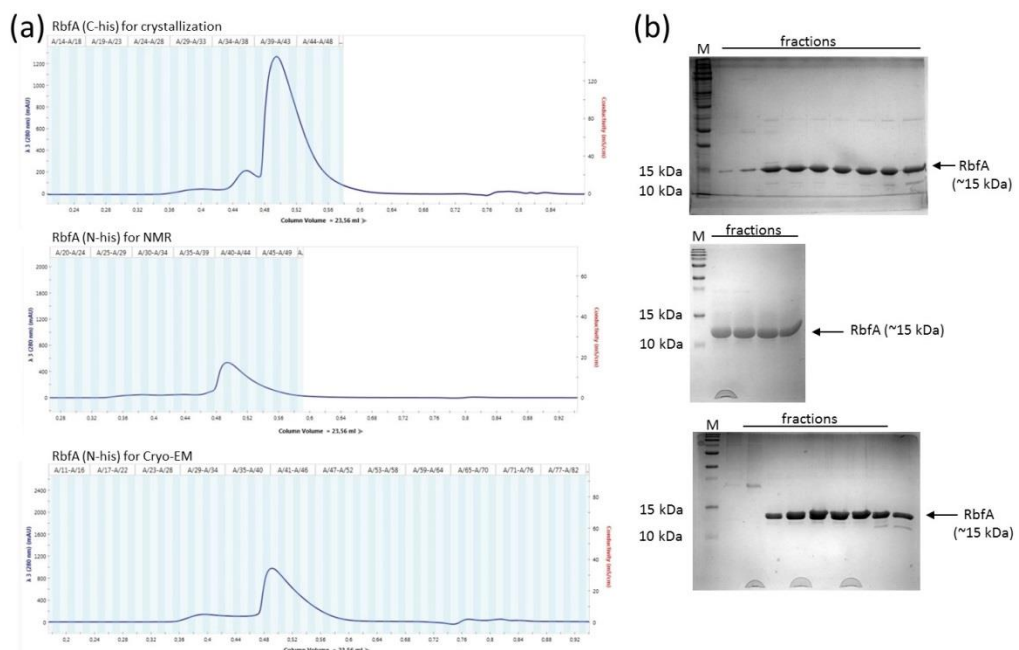

## II. SUPPLEMENTARY TABLES

**Supplementary Table S1.** X-ray data collection and refinement statistics.

| RbfA                                                                  |                           |
|-----------------------------------------------------------------------|---------------------------|
| Resolution range (Å)                                                  | 32.66 - 2.22 (2.3 - 2.22) |
| Space group                                                           | P 4 <sub>1</sub>          |
| Unit cell                                                             |                           |
| a, b, c (Å)                                                           | 65.31, 65.31, 27.28       |
| $\alpha$ , $\beta$ , $\gamma$ (°)                                     | 90.0, 90.0, 90.0          |
| Multiplicity                                                          | 7.2 (6.9)                 |
| Completeness (%)                                                      | 99.88 (100.00)            |
| Mean I/sigma(I)                                                       | 18.60 (2.44)              |
| Wilson B-factor                                                       | 49.47                     |
| R-merge                                                               | 0.06 (0.78)               |
| R-meas                                                                | 0.06 (0.85)               |
| R-pim                                                                 | 0.02 (0.32)               |
| CC <sub>1/2</sub>                                                     | 0.99 (0.89)               |
| Refinement                                                            |                           |
| R-work                                                                | 0.20                      |
| R-free                                                                | 0.24                      |
| No. of atoms                                                          | 852                       |
| protein                                                               | 838                       |
| water                                                                 | 14                        |
| R.m.s. deviations                                                     |                           |
| Bond lengths (Å)                                                      | 0.01                      |
| Bond angles (°)                                                       | 1.01                      |
| Ramachandran favored (%)                                              | 98.97                     |
| Ramachandran allowed (%)                                              | 1.03                      |
| Clashscore                                                            | 9.94                      |
| Average B-factor                                                      | 56.79                     |
| protein                                                               | 56.81                     |
| water                                                                 | 55.68                     |
| Statistics for the highest-resolution shell are shown in parentheses. |                           |

**Supplementary Table S2.** Statistical information for RbfA structural ensemble.

| Distance Constraints                            |             |
|-------------------------------------------------|-------------|
| total                                           | 1486        |
| intra-residual                                  | 372         |
| inter-residual                                  | 1114        |
| sequential (i - j = 1)                          | 495         |
| medium (i - j = 2,3,4)                          | 388         |
| long-range (i - j > 4)                          | 231         |
| Dihedral Angle Constraints                      |             |
| Phi restraints                                  | 85          |
| Psi restraints                                  | 85          |
| Structural Statistics                           |             |
| number of NOE violations                        | 10          |
| number of dihedral angle restraint violations   | 0           |
| RMSD for bond deviations (Å)                    | 0.01        |
| RMSD for angle deviations (deg)                 | 0.99        |
| RMSD of all backbone atoms (Å)                  |             |
| Met4-Tyr94                                      | 1.02 ± 0.26 |
| Met4-Lys24                                      | 0.44 ± 0.12 |
| Asp57-Lys69                                     | 0.22 ± 0.11 |
| Lys71-Glu79                                     | 0.28 ± 0.09 |
| His112-Asp115                                   | 0.75 ± 0.37 |
| Ile33-Leu40                                     | 0.34 ± 0.12 |
| Gln46-Val53                                     | 0.25 ± 0.09 |
| Glu89-Tyr94                                     | 0.30 ± 0.10 |
| Ramachandran Plot                               |             |
| residues in the most favored region (%)         | 90.6        |
| residues in the additionally allowed region (%) | 8.7         |
| residues in the disallowed region (%)           | 0.7         |

**Supplementary Table S3.** Oligonucleotide primers for *S. aureus* RbfA cloning.

| Primer name           | Primer sequence                                                  |
|-----------------------|------------------------------------------------------------------|
| rbfA_Nhis_NdeI_fwd    | 5'-<br>TTTTTTCATATGAGCAGTATGAGAGCAGAGCGTG<br>T-3'                |
| rbfA_Nhis_HindIII_rev | 5'-<br>TTTTTTAAGCTTATCTATCTTGTGTTGTAAATCTT<br>GAATCATTCGTTCAA-3' |
| rbfA_Chis_NcoI_fwd    | 5'-TTTTTTCATGAGCAGTATGAGAGCAGAGCG-3'                             |
| rbfA_Chis_XhoI_rev    | 5'-<br>TTTTTCTCGAGTCTATCTTGTGTTGTAAATCTTG<br>AATCATTCGTTCAA-3'   |



**Supplementary Table S4.** Data collection, refinement, and validation statistics for *S. aureus* 30S-RbfA complex cryo- EM structure.

|                                                  |                            |
|--------------------------------------------------|----------------------------|
| <b><i>Data collection</i></b>                    |                            |
| Microscope                                       | FEI TALOS ARCTICA          |
| Camera                                           | Gatan K2 Quantum (4k x 4k) |
| Voltage (kV)                                     | 200                        |
| Defocus range (μm)                               | (-1.5) – (-3.0)            |
| Total dose (ē/Å <sup>2</sup> )                   | 53.3                       |
| Dose per frame(ē/Å <sup>2</sup> )                | 0.89                       |
| Number of frames                                 | 60                         |
| <b><i>Image processing</i></b>                   |                            |
| Number of images                                 | 876                        |
| Number of particles (used for 3D reconstruction) | 81421                      |
| Resolution (Å; at FSC <sup>a</sup> = 0.143)      | 2.89                       |
| CC <sup>a</sup> (mask)                           | 0.70                       |
| CC (box)                                         | 0.71                       |
| <b><i>Validation<sup>b</sup></i></b>             |                            |
| Clashscore <sup>c</sup>                          | 15.08                      |
| <b><i>Proteins</i></b>                           |                            |
| MolProbity score                                 | 1.97                       |
| Poor rotamers (%)                                | 0.93                       |
| Favored rotamers (%)                             | 70.51                      |
| Ramachandran allowed(%)                          | 4.18                       |
| Ramachandran favored (%)                         | 95.82                      |
| <b>RMS deviations</b>                            |                            |
| Bonds (Å)                                        | 0.005                      |
| Angles (°)                                       | 0.712                      |
| Bad bonds (%)                                    | 0.00                       |
| Bad angles (%)                                   | 0.00                       |
| Cis-Prolines (%)                                 | 0.00                       |
| CaBLAM outliers (%)                              | 3.8                        |
| CA Geometry outliers (%)                         | 0.83                       |
| <b><i>RNA</i></b>                                |                            |
| Probably wrong sugar puckers (%)                 | 0.26                       |
| Bad backbone conformations (%)                   | 17.35                      |
| Bad bonds (%)                                    | 0.00                       |
| Bad angles (%)                                   | 0.00                       |

<sup>a</sup> FSC, Fourier shell correlation; <sup>b</sup> Compiled using MolProbity [46]; CC, correlation coefficient; RMS, root-mean square.
